# Supplementary material for: Abnormal Topological Organization of Structural Covariance Networks in Patients with Temporal Lobe Epilepsy Comorbid Sleep Disorder
Source: MDPI journal article supplement (doi:10.3390/brainsci13101493), 2023-10-22
Supplement: s1 [file s1]

**Table S1** Names and indices of the AAL 90 parcellated brain regions

| Region                              | Abbreviations | Index (left) | Index (right) |
|-------------------------------------|---------------|--------------|---------------|
| Precentral gyrus                    | PreCG         | 1            | 2             |
| Superior frontal gyrus              | SFGdor        | 3            | 4             |
| Orbitofrontal cortex (superior)     | ORBsupb       | 5            | 6             |
| Middle frontal gyrus                | MFG           | 7            | 8             |
| Orbitofrontal cortex (middle)       | ORBmid        | 9            | 10            |
| Inferior frontal gyrus (opercular)  | IFGoperc      | 11           | 12            |
| Inferior frontal gyrus (triangular) | IFGtriang     | 13           | 14            |
| Orbitofrontal cortex (inferior)     | ORBinf        | 15           | 16            |
| Rolandic operculum                  | ROL           | 17           | 18            |
| Supplementary motor area            | SMA           | 19           | 20            |
| Olfactory                           | OLF           | 21           | 22            |
| Superior frontal gyrus (medial)     | SFGmed        | 23           | 24            |
| Orbitofrontal cortex (medial)       | ORBmed        | 25           | 26            |
| Rectus gyrus                        | REC           | 27           | 28            |
| Insula                              | INS           | 29           | 30            |
| Anterior cingulate gyrus            | ACG           | 31           | 32            |
| Middle cingulate gyrus              | MCG           | 33           | 34            |
| Posterior cingulate gyrus           | PCG           | 35           | 36            |
| Hippocampus                         | HIP           | 37           | 38            |
| Parahippocampal gyrus               | PHG           | 39           | 40            |
| Amygdala                            | AMYG          | 41           | 42            |
| Calcarine cortex                    | CAL           | 43           | 44            |
| Cuneus                              | CUN           | 45           | 46            |
| Lingual gyrus                       | LING          | 47           | 48            |
| Superior occipital gyrus            | SOG           | 49           | 50            |
| Middle occipital gyrus              | MOG           | 51           | 52            |
| Inferior occipital gyrus            | IOG           | 53           | 54            |
| Fusiform gyrus                      | FFG           | 55           | 56            |
| Postcentral gyrus                   | PoCG          | 57           | 58            |
| Superior parietal gyrus             | SPG           | 59           | 60            |
| Inferior parietal lobule            | IPL           | 61           | 62            |
| Supramarginal gyrus                 | SMG           | 63           | 64            |
| Angular gyrus                       | ANG           | 65           | 66            |
| Precuneus                           | PCUN          | 67           | 68            |
| Paracentral lobule                  | PCL           | 69           | 70            |
| Caudate                             | CAU           | 71           | 72            |
| Putamen                             | PUT           | 73           | 74            |
| Pallidum                            | PAL           | 75           | 76            |
| Thalamus                            | THA           | 77           | 78            |
| Heschl gyrus                        | HES           | 79           | 80            |

|                          |        |    |    |
|--------------------------|--------|----|----|
| Superior temporal gyrus  | STG    | 81 | 82 |
| Temporal pole (superior) | TPOsup | 83 | 84 |
| Middle temporal gyrus    | MTG    | 85 | 86 |
| Temporal pole (middle)   | TPOmid | 87 | 88 |
| Inferior temporal gyrus  | ITG    | 89 | 90 |

---
